# Supplementary material for: Sex Differences in Frequency of Instrumental Activities of Daily Living after Cardiac Rehabilitation and Its Impact on Outcomes in Patients with Heart Failure
Source: MDPI journal article supplement (doi:10.3390/jcdd9090289), 2022-08-31
Supplement: s1 [file s1]

## Supplementary Materials:

Table S1. The FAI component values in females and males.

| Component of the FAI             | Female  | Male    | P value |
|----------------------------------|---------|---------|---------|
| 1. Preparing meals               | 3 (2–3) | 1 (0–3) | <0.001  |
| 2. Washing up                    | 3 (3–3) | 2 (0–3) | <0.001  |
| 3. Washing clothes               | 3 (2–3) | 0 (0–3) | <0.001  |
| 4. Light house work              | 3 (2–3) | 2 (0–3) | <0.001  |
| 5. Heavy house work              | 2 (0–3) | 1 (0–3) | 0.025   |
| 6. Local shopping                | 3 (2–3) | 3 (1–3) | 0.008   |
| 7. Social outings                | 2 (0–3) | 2 (1–3) | 0.523   |
| 8. Walking outside for >15 min   | 3 (2–3) | 3 (2–3) | 0.152   |
| 9. Pursuing hobby                | 1 (0–3) | 1 (0–3) | 0.941   |
| 10. Driving or bus travel        | 3 (1–3) | 3 (2–3) | <0.001  |
| 11. Outings or car rides         | 0 (0–0) | 0 (0–1) | 0.003   |
| 12. Gardening                    | 0 (0–1) | 0 (0–1) | 0.735   |
| 13. Household or car maintenance | 0 (0–1) | 1 (0–2) | <0.001  |
| 14. Reading books                | 2 (0–3) | 2 (0–3) | 0.621   |
| 15. Gainful work                 | 0 (0–0) | 0 (0–3) | <0.001  |

Values are expressed as median (interquartile range).

FAI, Frenchay Activities Index.
